# Supplementary material
Source: publisher figshare collection journal article supplement (https://acs.figshare.com/ndownloader/files/24685275)
Supplement: Supplementary file 1 [file 24685275]

---

## Supporting Information

### Unravel the Catalytic Effect of 2-Dimensional Metal Sulfides on Polysulfides Conversions for Lithium-Sulfur Batteries

*Chunli Wang<sup>1,2</sup>, Lianshan Sun<sup>3</sup>, Kai Li<sup>1,\*</sup>, Zhijian Wu<sup>1</sup>, Feifei Zhang<sup>4,\*</sup>, Limin Wang<sup>1,\*</sup>*

<sup>1</sup>State Key Laboratory of Rare Earth Resource Utilization, Changchun Institute of Applied Chemistry, Chinese Academy of Sciences, Changchun, 130022, P. R. China

<sup>2</sup>School of Applied Chemistry and Engineering, University of Science and Technology of China, Hefei, 230026, P. R. China

<sup>3</sup>Institute for Energy Research, Key Laboratory of Zhenjiang, Jiangsu University, Zhenjiang 212013, PR China

<sup>4</sup>Department of Materials Science and Engineering, Faculty of Engineering, National University of Singapore, 117576, Singapore

E-mail: kaili@ciac.ac.cn, msezf@nus.edu.sg, lmwang@ciac.ac.cn

---

## Experimental Section

### 1. Materials Preparations

In a typical synthesis, 100 mg of  $\text{Na}_2\text{CrO}_4$ ,  $(\text{NH}_4)_7\text{Mo}_6\text{O}_{24}$ ,  $\text{Na}_2\text{WO}_4$  was dissolved into 5 mL of deionized water, respectively; then 100 mg dopamine hydrochloride was added into the above solution to form Cr-DA, Mo-DA and W-DA complexes. Each of the resulting solution was added into 40 g of NaCl and 2 g of thiourea and stirred uniformly until the solution is fully absorbed by the template nanoparticles. The solid particles were freeze-dried at  $-45\text{ }^\circ\text{C}$  to remove water in the mixture. After annealing the prepared precursors at  $700\text{ }^\circ\text{C}$  for 5 h under  $\text{Ar}/\text{H}_2$  atmosphere, the products were obtained after removing NaCl by filtering with water several times and dried at  $60\text{ }^\circ\text{C}$  for 12 h. Similarly, the carbon matrix was synthesized through the same method without the addition of metalate salts. Synthesis of the NCs-S,  $\text{Cr}_3\text{S}_4/\text{C-S}$ ,  $\text{MoS}_2/\text{C-S}$  and  $\text{WS}_2/\text{C-S}$  was performed by mixing sulfur powder with the as-prepared products, then sealing in a Teflon-lined stainless-steel autoclave ( $\text{N}_2$  atmosphere), and heating at  $155\text{ }^\circ\text{C}$  for 12 h and  $200\text{ }^\circ\text{C}$  for 2 h.

### 2. Material characterizations:

SEM characterizations were conducted on Hitachi S-4800 field emission scanning electron microscopy. Transmission electron microscopy (TEM), high-resolution TEM (HRTEM) images and energy-dispersive X-ray spectroscopy (EDX) element mapping were performed using a FEI Tecnai G2 S-Twin instrument. X-ray diffraction (XRD) patterns were determined by a Bruker D8 Focus power X-ray diffractometer using  $\text{Cu K}\alpha$  radiation. A STA 449  $^\circ\text{C}$  Jupiter (NETZSCH) thermogravimetry instrument was used for Thermogravimetric (TGA) analysis. The  $\text{N}_2$  adsorption–desorption isotherm was performed on a Micromeritics ASAP 2020 instrument. X-ray photoelectron spectroscopy (XPS) characterizations were carried out in an ESCALAB 250 instrument with 150W  $\text{Al K}\alpha$  probe beam. The surface area measurement was performed on Micromeritics ASAP 2010 instrument. Raman spectra characterizations were performed on a T64000 instrument from JY company from French.

---

### 3. Preparation of Lithium Polysulfides ( $\text{Li}_2\text{S}_6$ )

$\text{Li}_2\text{S}_6$  solution was prepared first by mixing  $\text{Li}_2\text{S}$  and sulfur at a molar ratio of 1:5 in a solution with 1 M lithium bis (trifluoromethane sulfonyl) imide ( $\text{LiTFSI}$ ) in 1,3-dioxolane (DOL) and 1,2-dimethoxyethane (DME) (v/v 1:1), followed by stirring at 60 °C for two days inside an argon-filled glove box.

### 4. Visualized Adsorption and catalytic studies of LiPSs

Typically, NCs,  $\text{Cr}_3\text{S}_4/\text{C}$ ,  $\text{MoS}_2/\text{C}$  and  $\text{WS}_2/\text{C}$  with surface areas of 1  $\text{m}^2$  were dispersed individually into the solutions with 5 mL  $\text{Li}_2\text{S}_6$  concentration of 12.5  $\text{mmol L}^{-1}$ , respectively. After standing for 5 h, via observing the color change in the supernatant of residual LiPSs, the level of the adsorption ability for LiPSs of the above products was initially determined. Finally, the precipitates denoted as  $\text{Cr}_3\text{S}_4\text{-Li}_2\text{S}_6$ ,  $\text{MoS}_2\text{-Li}_2\text{S}_6$  and  $\text{WS}_2\text{-Li}_2\text{S}_6$  were obtained by centrifugation to analyze the states of the material surface by XPS tests.

### 5. Assembly of symmetric cells and kinetic evaluation of polysulfide conversion

The corresponding electrodes were fabricated with NCs,  $\text{Cr}_3\text{S}_4/\text{C}$ ,  $\text{MoS}_2/\text{C}$  and  $\text{WS}_2/\text{C}$  composites, where the active material and poly(vinylidene fluoride) (PVDF) with the mass ratio of 5:1 were dispersed in N-methyl pyrrolidone (NMP) solution to form uniform slurry and then chopped into the round electrode piece of 12 mm with ~2 mg mass loading. The symmetrical 2025 coin cells ( $\text{Li}_2\text{S}_6\text{-Li}_2\text{S}_6$ ) with a Celgard 2400 membrane as separator were fabricated and those disks were used as identical working and counter electrodes containing 40  $\mu\text{L}$  electrolyte of 0.2 M  $\text{Li}_2\text{S}_6$ . Same electrolyte without  $\text{Li}_2\text{S}_6$  was used as a control. The cyclic voltammetry (CV) and electrochemical impedance spectroscopy (EIS) measurements of the symmetrical cells were operated at a scan rate of 1 and 100  $\text{mV s}^{-1}$  with the voltage window between from -1 V to 1 V.

The electrocatalytic activity of NCs,  $\text{Cr}_3\text{S}_4/\text{C}$ ,  $\text{MoS}_2/\text{C}$  and  $\text{WS}_2/\text{C}$  toward LiPSs conversion reactions were further measured by nucleation of  $\text{Li}_2\text{S}$  on different reactive surfaces using CV. The asymmetrical 2025 coin cells were probed, where a piece of lithium foil worked as the

---

counter electrode, an identical new electrode used in aforementioned kinetic study served as the working electrode, 20  $\mu\text{L}$  of 0.2 M  $\text{Li}_2\text{S}_6$  solution (0.768 mg based on S) was applied as catholyte, and 20  $\mu\text{L}$  of control electrolyte without  $\text{Li}_2\text{S}_6$  was used as anolyte. The assembled cells were firstly galvanostatically discharged at 0.15 mA to 1.80 V for full transformation of LiPSs species into solid  $\text{Li}_2\text{S}$  on catalytically reactive interfaces then potentiostatically charged at 2.40 V for the oxidization of  $\text{Li}_2\text{S}$  into soluble LiPSs using a programmable battery testing system (LAND CT2001A). Reversely, the assembled cells were discharged galvanostatically at 0.15 mA to 2.08 V and then discharged potentiostatically at 2.07 V for  $\text{Li}_2\text{S}$  nucleation and growth on a Bio-Logic VMP3 Electrochemical Workstation. The potentiostatic discharge was terminated the charge current was below  $10^{-5}$  A.

## **6. Electrochemical measurements:**

The electrodes were made by mixing 70% sulfur-impregnated powders, 20% carbon black and 10 % polyvinylidene fluoride (PVDF) with 1-methyl-2-pyrrolidinone (NMP), then coated evenly onto carbon-coated aluminum foil. This film was then dried at 40  $^{\circ}\text{C}$  in a vacuum oven for 12 h, and cut into discs with a typical diameter of 12 mm, where the content of active material was around  $\sim 1.4$  mg. A solution of 1 M (LITFSI) and 0.1 M lithium nitrate ( $\text{LiNO}_3$ ) dissolved in mixed solvent of dimethoxyethane (DME) and 1, 3-dioxolane (DOL) with a volume ratio of 1:1 was employed as electrolyte. The coin cells (CR-2025) were assembled glove box where 30  $\mu\text{L}$  of the electrolyte was added to wet the sulfur cathode, a Celgard 2400 separator was then placed over the electrode, and the lithium foil anode with a size of 14 mm was placed on top of the separator. The discharge/charge performances were tested galvanostatically using a programmable battery testing system (LAND CT2001A) at room temperature under different C-rates ( $1\text{ C} = 1675\text{ mA g}^{-1}$ ) within a potential range of 1.7–2.6 V. CV measurements were conducted with a scanning rate of  $0.1\text{ mV s}^{-1}$  and the potential vs.  $\text{Li}^+/\text{Li}$  ranging from 1.7 to 2.8 V on a Bio-Logic VMP3 Electrochemical Workstation.

## **7. Computational Details**

---

The calculations were carried out using density functional theory (DFT+U) with the Perdew-Burke-Ernzerhof (PBE) form of generalized gradient approximation functional (GGA). [1] The Vienna ab-initio simulation package (VASP) [2-4] was employed. The plane wave energy cutoff was set as 400 eV. The Fermi scheme was employed for electron occupancy with an energy smearing of 0.1 eV. The first Brillouin zone was sampled in the Monkhorst–Pack grid [5]. The  $3 \times 3 \times 1$  k-point mesh for the calculations. The energy (converged to  $1.0 \times 10^{-6}$  eV/atom) and force (converged to 0.01 eV/Å) were set as the convergence criterion for geometry optimization. The spin polarization was considered in all calculation.

### Models

The  $\text{Cr}_3\text{S}_4$  (-202),  $\text{MoS}_2$  (100) and  $\text{WS}_2$  (100) surfaces show high intensities in XRD, thus the targeted simulative structures were selected by cutting the corresponding bulk along [-202], [100] and [100] crystal planes, separately. A vacuum layer as large as 15 Å was used along the direction normal to the surface to avoid periodic interactions. The equations of the lithiation process could be presented as follows:

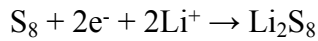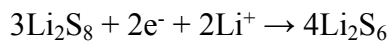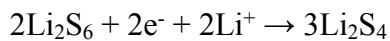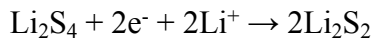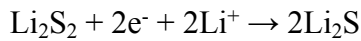

And the Gibbs free energy changes ( $\Delta G$ ) of the corresponding reactions on catalytically reactive interfaces have been investigated. The  $\Delta G$  is defined as follows [6] :

$$\Delta G_1 = G_{\text{Li}_2\text{S}_8} - (G_{\text{S}_8} + 2\mu_{\text{Li}})$$

$$\Delta G_2 = G_{\text{Li}_2\text{S}_6} - (3/4 G_{\text{Li}_2\text{S}_8} + 2/4 \mu_{\text{Li}})$$

$$\Delta G_3 = G_{\text{Li}_2\text{S}_4} - (2/3 G_{\text{Li}_2\text{S}_6} + 2/3 \mu_{\text{Li}})$$

---


$$\Delta G_4 = G_{Li_2S_2} - (1/2 G_{Li_2S_4} + \mu_{Li})$$

$$\Delta G_5 = G_{Li_2S} - (1/2 G_{Li_2S_2} + \mu_{Li})$$

where  $G_{S_8}$ ,  $G_{Li_2S_8}$ ,  $G_{Li_2S_6}$ ,  $G_{Li_2S_4}$ ,  $G_{Li_2S_2}$ , and  $G_{Li_2S}$  is the total energy of these polysulfides adsorbed on  $Cr_3S_4$ ,  $MoS_2$  and  $WS_2$  surfaces, respectively. And  $\mu_{Li}$  is the chemical potential of the Li.

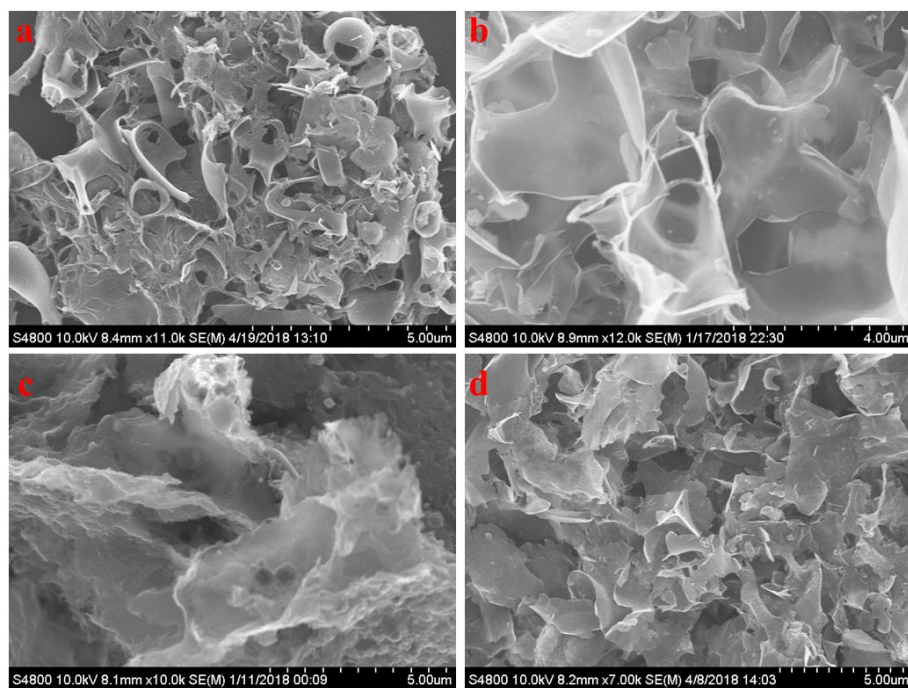

**Figure S1.** SEM images of (a) NCs, (b)  $\text{Cr}_3\text{S}_4/\text{C}$ , (c)  $\text{MoS}_2/\text{C}$  and (d)  $\text{WS}_2/\text{C}$  flakes.

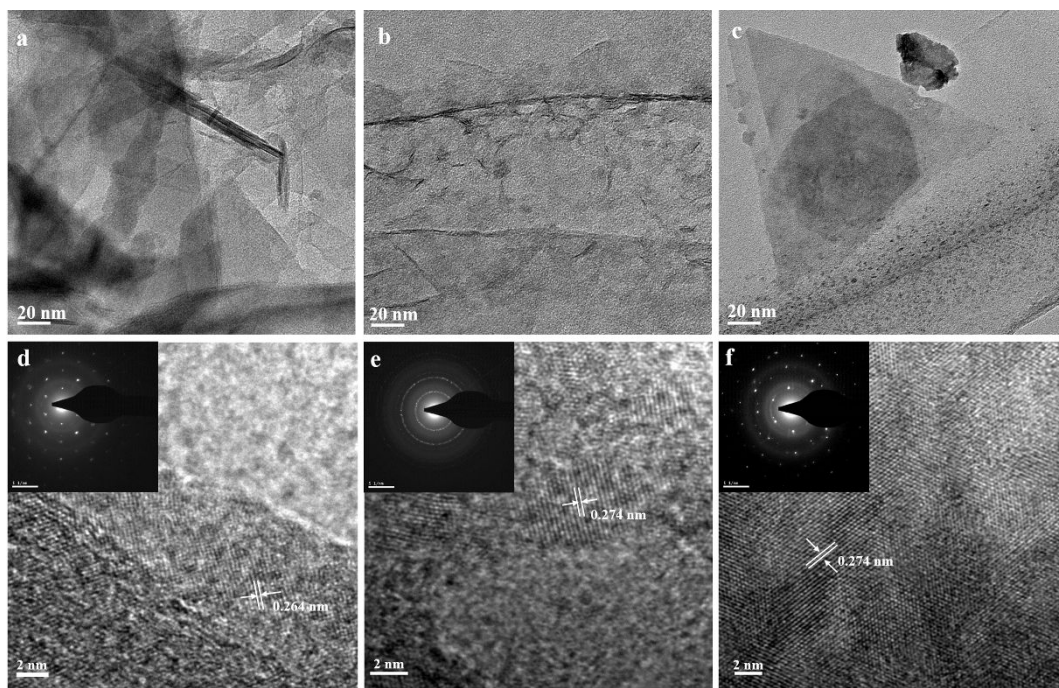

**Figure S2.** Typical TEM images and HRTEM image of (a, d)  $\text{Cr}_3\text{S}_4/\text{C}$ , (b, e)  $\text{MoS}_2/\text{C}$  and (c, f)  $\text{WS}_2/\text{C}$  flakes; the insets are the corresponding SAED patterns.



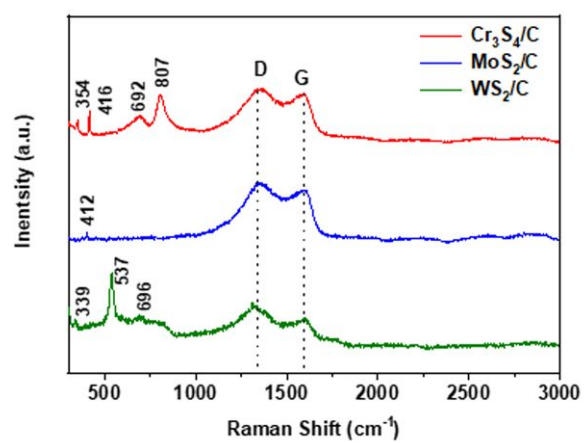

**Figure S3.** Raman spectra of Cr<sub>3</sub>S<sub>4</sub>/C, MoS<sub>2</sub>/C and WS<sub>2</sub>/C flakes.

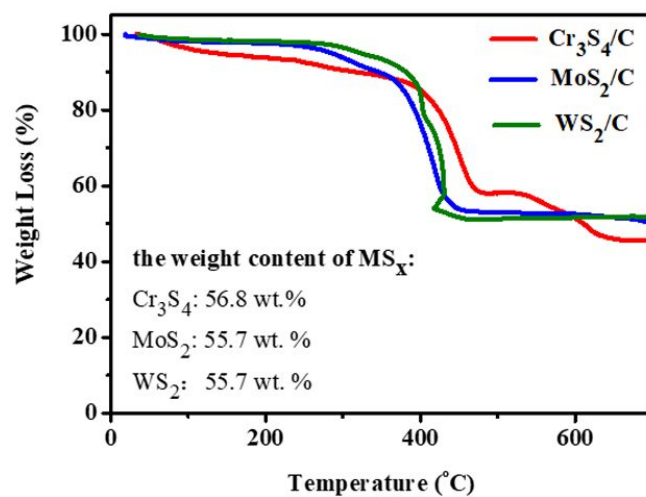

**Figure S4.** TGA curves of Cr<sub>3</sub>S<sub>4</sub>/C, MoS<sub>2</sub>/C and WS<sub>2</sub>/C flakes under air atmosphere.

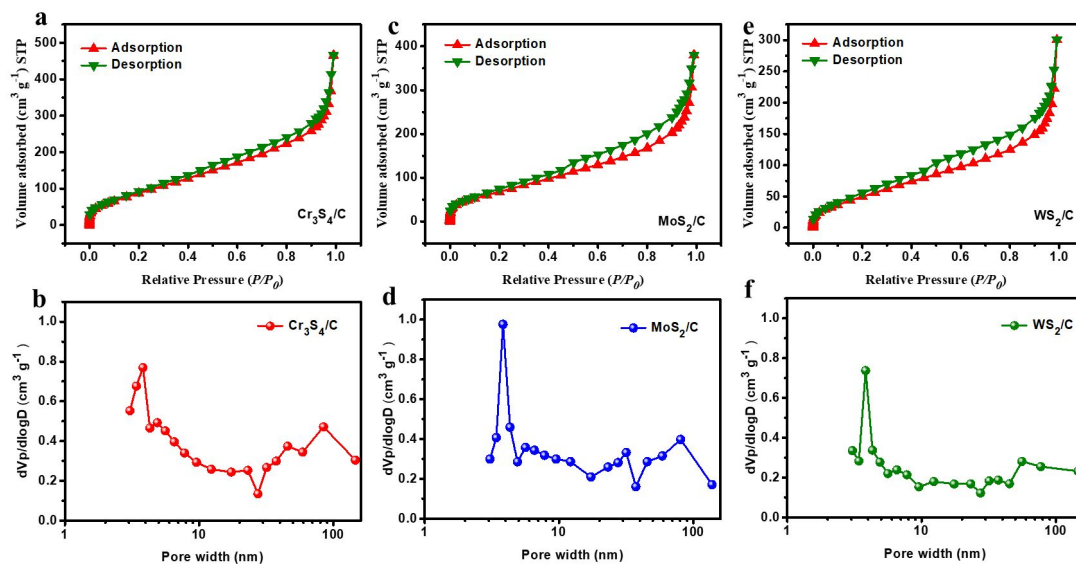

**Figure S5.** N<sub>2</sub> adsorption–desorption isotherms of (a) Cr<sub>3</sub>S<sub>4</sub>/C, (c) MoS<sub>2</sub>/C, (e) WS<sub>2</sub>/C and pore size distribution of (b) Cr<sub>3</sub>S<sub>4</sub>/C, (d) MoS<sub>2</sub>/C, (f) WS<sub>2</sub>/C.

---

**Table S1.** Physical properties of Cr<sub>3</sub>S<sub>4</sub>/C, MoS<sub>2</sub>/C and WS<sub>2</sub>/C.

| <b>samples</b>                    | <b>BET<br/>(m<sup>2</sup> g<sup>-1</sup>)</b> | <b>Pore Volume<br/>(cm<sup>3</sup> g<sup>-1</sup>)</b> | <b>Micro Pore<br/>Volume (cm<sup>3</sup> g<sup>-1</sup>)</b> | <b>PSD (nm)</b> |
|-----------------------------------|-----------------------------------------------|--------------------------------------------------------|--------------------------------------------------------------|-----------------|
| Cr <sub>3</sub> S <sub>4</sub> /C | 354.8                                         | 0.72                                                   | 0.12                                                         | 8.11            |
| MoS <sub>2</sub> /C               | 259.5                                         | 0.59                                                   | 0.094                                                        | 9.07            |
| WS <sub>2</sub> /C                | 196.8                                         | 0.47                                                   | 0.068                                                        | 9.44            |

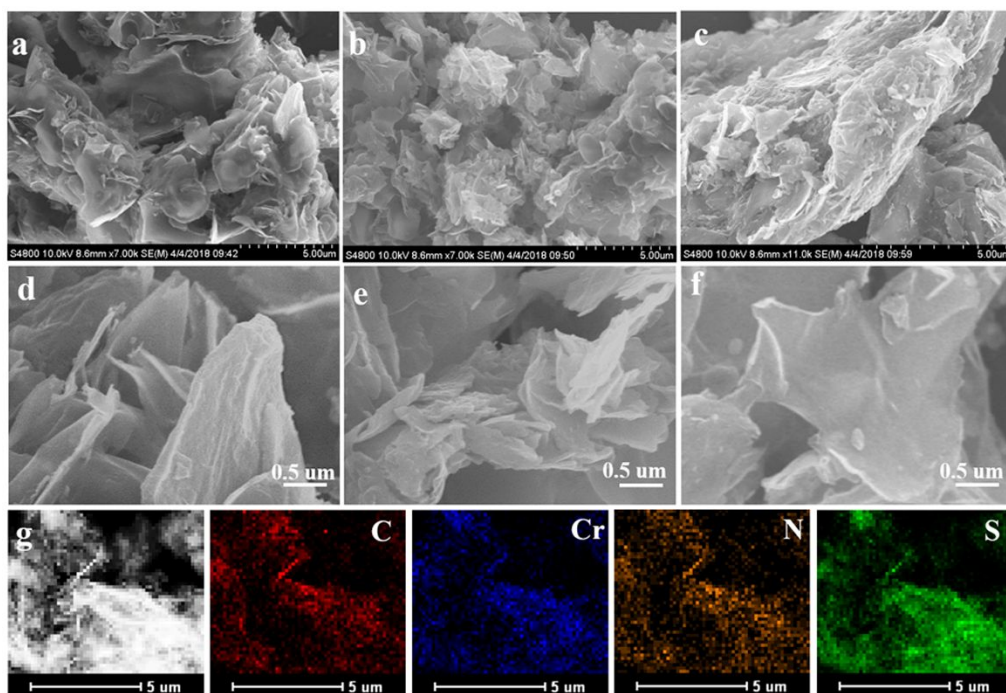

**Figure S6.** the SEM images of (a, d) Cr<sub>3</sub>S<sub>4</sub>/C-S, (b, e) MoS<sub>2</sub>/C-S, (c, f) WS<sub>2</sub>/C-S; (g) the EDX mappings of Cr<sub>3</sub>S<sub>4</sub>/C-S with C, Cr, S elements.

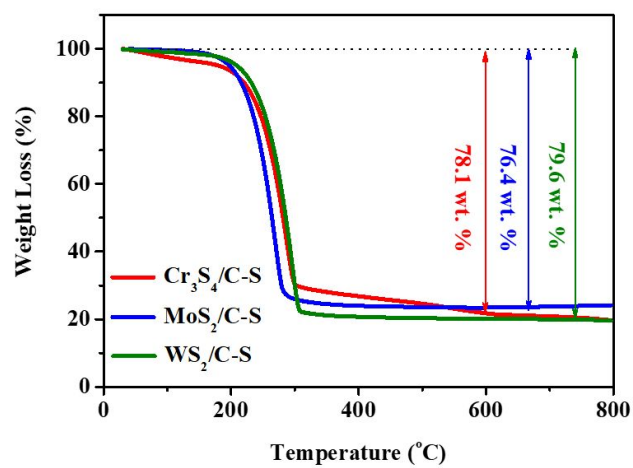

**Figure S7.** The TGA curves of Cr<sub>3</sub>S<sub>4</sub>/C-S, MoS<sub>2</sub>/C-S and WS<sub>2</sub>/C-S.

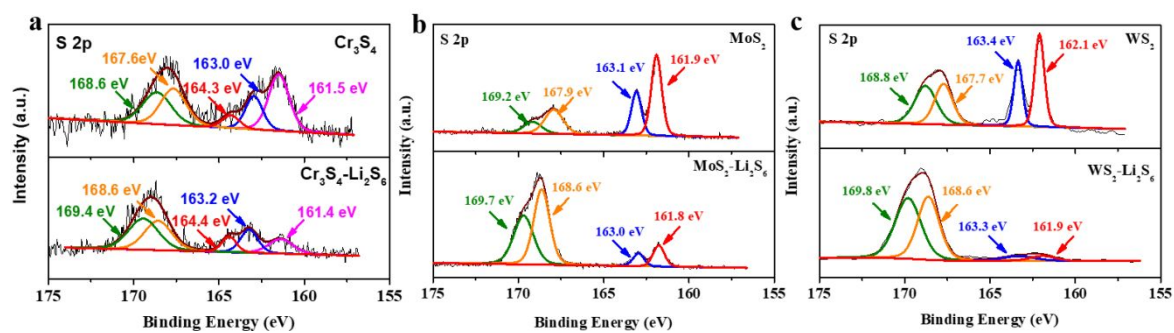

**Figure S8.** the high resolution XPS spectrums of S 2p of (a) Cr<sub>3</sub>S<sub>4</sub>/C, (b) MoS<sub>2</sub>/C, (c) WS<sub>2</sub>/C before and after Li<sub>2</sub>S<sub>6</sub> adsorption.

---

**Table S2.** The peaks of the symmetric cells of NCs, Cr<sub>3</sub>S<sub>4</sub>/C, MoS<sub>2</sub>/C and WS<sub>2</sub>/C.

| <div>Samples<br/>Peaks (V)</div> | NCs    | Cr <sub>3</sub> S <sub>4</sub> /C | MoS <sub>2</sub> /C | WS <sub>2</sub> /C |
|----------------------------------|--------|-----------------------------------|---------------------|--------------------|
| Peak I                           | 0.194  | 0.108                             | 0.153               | 0.08               |
| Peak II                          | 0.53   | 0.358                             | 0.409               | 0.305              |
| Peak III                         | -0.207 | -0.103                            | -0.142              | -0.112             |
| Peak IV                          | -0.518 | -0.387                            | -0.387              | -0.454             |



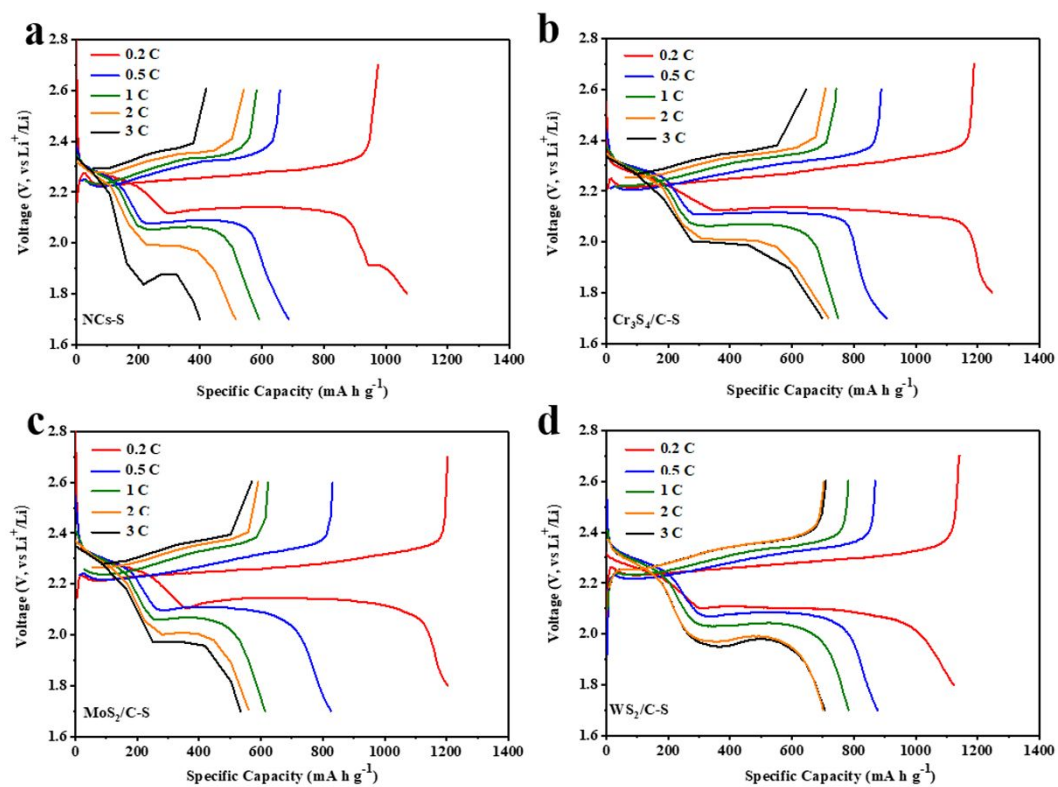

**Figure S9.** The discharge/charge curves at different current densities for (a) NCs-S, (b)  $\text{Cr}_3\text{S}_4/\text{C-S}$ , (c)  $\text{MoS}_2/\text{C-S}$  and (d)  $\text{WS}_2/\text{C-S}$  electrodes.

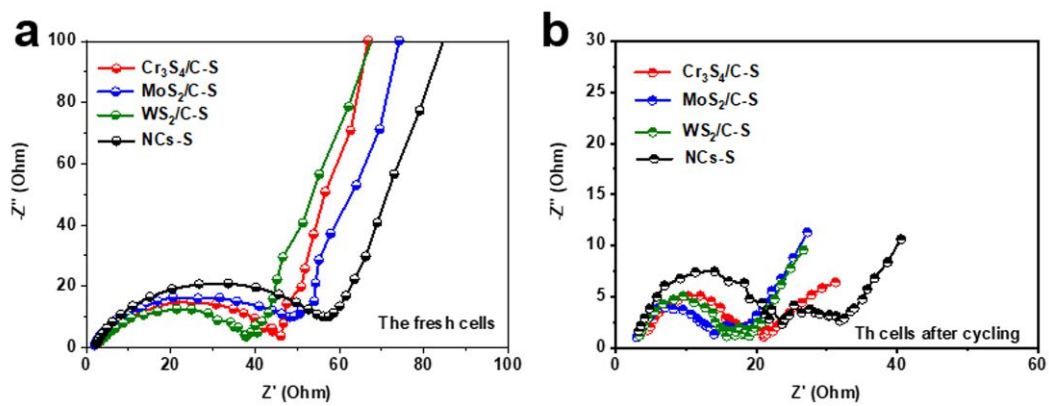

**Figure S10.** The EIS spectrums of (a) the fresh cells and (b) the cells after cycling 150 th cycles at 0.2 C based of the composites.

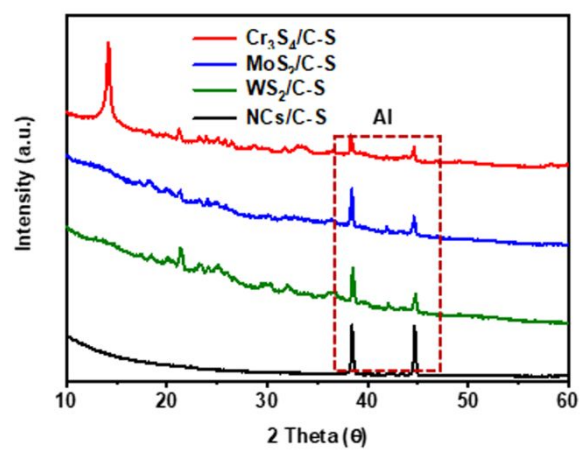

**Figure S11.** The XRD patterns of the cathodes after cycling 100 th cycles.

**Table S3.** Electrochemical performances of LSBs based on various metal sulfides materials

| Host materials                        | S content<br>(wt. %) | The active material<br>loading (mg cm <sup>-2</sup> ) | Specific surface area (mg cm <sup>-3</sup> ) |      | Cycle capacity (mA h g <sup>-1</sup> ) |                            | Ref.             |
|---------------------------------------|----------------------|-------------------------------------------------------|----------------------------------------------|------|----------------------------------------|----------------------------|------------------|
|                                       |                      |                                                       | Catalyst content (%)                         |      | Initial Retention                      |                            |                  |
| Cr S <sub>3</sub> /C <sub>4</sub>     | 78.1                 | 0.8-1                                                 | 354.8                                        | 12.4 | 1288                                   | 840 (150 cycles at 0.2 C)  | <i>This work</i> |
| Pt/graphene                           | N/A                  | N/A                                                   | N/A                                          | N/A  | 1108                                   | 780 (100 cycles at 0.2 C)  | 9                |
| NiS <sub>2</sub> /C                   | 54.9                 | 0.8–1.3                                               | N/A                                          | N/A  | 1153                                   | 730 (200 cycles at 0.5 C)  | 16               |
| WS <sub>2</sub> -WS <sub>2</sub> /CCI | N/A                  | ~3                                                    | N/A                                          | N/A  | 1500 C)                                | 1000 (500 cycles at 0.5 C) | 17               |
| MoS <sub>2-x</sub> /rGO               | 75                   | 2-4                                                   | N/A                                          | 12   | 1160                                   | 820 (150 cycles at 0.5 C)  | 18               |
| CoS <sub>2</sub> /Graphene            | 75                   | 0.4                                                   | 709                                          | 15   | 1368                                   | 1005 (150 cycles at 0.5 C) | 30               |
| WS <sub>2</sub> /Graphene             | 70                   | 2.7                                                   | N/A                                          | 4    | 931.7                                  | 696.2 (500 cycles at 1 C)  | 58               |

---

**Tables S4.** The Gibbs free energy of  $\text{Li}_2\text{S}_x$  during lithiation on  $\text{Cr}_3\text{S}_4$ ,  $\text{MoS}_2$  and  $\text{WS}_2$ .

| <b>Samples</b><br><b>Gibbs free energy (eV)</b> | <b><math>\text{Cr}_3\text{S}_4</math></b> | <b><math>\text{MoS}_2</math></b> | <b><math>\text{WS}_2</math></b> |
|-------------------------------------------------|-------------------------------------------|----------------------------------|---------------------------------|
| $\Delta G_1$                                    | -3.64                                     | -2.73                            | -3.84                           |
| $\Delta G_2$                                    | -2.25                                     | -1.95                            | -3.17                           |
| $\Delta G_3$                                    | -4.67                                     | -4.54                            | -2.2                            |
| $\Delta G_4$                                    | -7.55                                     | -6.4                             | -8.52                           |
| $\Delta G_5$                                    | -9.2                                      | -5.85                            | -11.7                           |

---

## Reference

- [1] J P Perdew, K Burke, M Ernzerhof, *Phys. Rev. Lett.* **1996**, 77, 3865.
- [2] G Kresse, J Hafner, *Phys. Rev. B.* **1993**, 47, 558.
- [3] G Kresse, J Hafner, *Phys. Re. B* **1994**, 49, 14251.
- [4] G Kresse, J Furthmüller, *Phys. Rev. B* **1996**, 54, 11169.
- [5] H J Monkhorst, J D Pack, *Phys. Rev. B* **1976**, 13, 5188.
- [6] J Wu, L W Wang. *J. Mater. Chem. A.* **2018**, 6, 2984.
